# Supplementary material for: Prognostic influence of Korean public medical insurance system on breast cancer patients
Source: PubMed Central journal article supplement — Ann Surg Treat Res. 2018 Jan 30;96(2):58–69. doi: 10.4174/astr.2019.96.2.58 (PMC6358593; doi:10.4174/astr.2019.96.2.58), 2018-01-30
Supplement: astr-96-58-s001.pdf [file astr-96-58-s001.pdf]

**Supplementary Table 1.** Detailed overall survival rates and recurrence-free survival rates according to medical insurance status

| Survival                     | National Health Insurance |                        |       | Medical Aid |                        |       | Total      |                        |       |
|------------------------------|---------------------------|------------------------|-------|-------------|------------------------|-------|------------|------------------------|-------|
|                              | Subject No                | Event No <sup>a)</sup> | Rate  | Subject No  | Event No <sup>a)</sup> | Rate  | Subject No | Event No <sup>a)</sup> | Rate  |
| Overall survival             |                           |                        |       |             |                        |       |            |                        |       |
| 60 Months                    | 961                       | 79                     | 88.9% | 107         | 21                     | 76.1% | 1,068      | 100                    | 87.4% |
| 120 Months                   | 417                       | 119                    | 77.1% | 50          | 27                     | 62.8% | 467        | 146                    | 75.4% |
| 180 Months                   | 157                       | 126                    | 68.9% | 21          | 30                     | 29.2% | 178        | 156                    | 64.8% |
| Last follow-up <sup>b)</sup> | 28                        | 127                    | 66.2% | 1           | 30                     | 29.2% | 29         | 157                    | 62.4% |
| Recurrence-free survival     |                           |                        |       |             |                        |       |            |                        |       |
| 60 Months                    | 918                       | 96                     | 85.1% | 100         | 21                     | 71.2% | 1,018      | 117                    | 83.6% |
| 120 Months                   | 296                       | 118                    | 75.0% | 31          | 23                     | 64.4% | 327        | 141                    | 73.9% |
| 180 Months                   | 67                        | 120                    | 71.7% | NA          | NA                     | NA    | 74         | 144                    | 69.3% |
| Last follow-up <sup>c)</sup> | 6                         | 120                    | 71.7% | 7           | 24                     | 48.3% | 6          | 144                    | 69.3% |

<sup>a)</sup>Cumulative number of events. <sup>b)</sup>209 months, 196 months, and 209 months for National Health Insurance, Medical Aid, and total subjects, respectively. <sup>c)</sup>192 months, 149 months, and 192 months for National Health Insurance, Medical Aid, and total subjects, respectively.
