# Supplementary material for: Prognostic influence of Korean public medical insurance system on breast cancer patients
Source: PubMed Central journal article supplement — Ann Surg Treat Res. 2018 Jan 30;96(2):58–69. doi: 10.4174/astr.2019.96.2.58 (PMC6358593; doi:10.4174/astr.2019.96.2.58), 2018-01-30
Supplement: astr-96-58-s002.pdf [file astr-96-58-s002.pdf]

Supplementary Table 2. Continued

| Characteristics                      | HRc(+)/HER2(-)            |      |                       | HRc(+)/HER2(+)            |    |                       | HRc(-)/HER2(+)            |      |                       | HRc(-)/HER2(-)            |   |                       |     |      |   |      |
|--------------------------------------|---------------------------|------|-----------------------|---------------------------|----|-----------------------|---------------------------|------|-----------------------|---------------------------|---|-----------------------|-----|------|---|------|
|                                      | National Health Insurance |      | P-value <sup>a)</sup> | National Health Insurance |    | P-value <sup>a)</sup> | National Health Insurance |      | P-value <sup>a)</sup> | National Health Insurance |   | P-value <sup>a)</sup> |     |      |   |      |
|                                      | No.                       | %    |                       | No.                       | %  |                       | No.                       | %    |                       | No.                       | % |                       | No. | %    |   |      |
| Age (yr)                             |                           |      | 0.192                 |                           |    | 0.228                 |                           |      | 0.446                 |                           |   | 0.594                 |     |      |   |      |
| ≤50                                  | 170                       | 44.5 | 17                    | 34.7                      | 58 | 54.2                  | 3                         | 33.3 | 15                    | 24.6                      | 1 | 12.5                  | 39  | 34.2 | 2 | 25.0 |
| >50                                  | 212                       | 55.5 | 32                    | 65.3                      | 49 | 45.8                  | 6                         | 66.7 | 46                    | 75.4                      | 7 | 87.5                  | 75  | 65.8 | 6 | 75.0 |
| Body mass index (kg/m <sup>2</sup> ) |                           |      | 0.200                 |                           |    | 0.016                 |                           |      | 1.000                 |                           |   | 0.395                 |     |      |   |      |
| ≤25                                  | 240                       | 63.7 | 26                    | 54.2                      | 75 | 72.1                  | 2                         | 28.6 | 30                    | 50.0                      | 4 | 50.0                  | 67  | 59.8 | 6 | 75.0 |
| >25                                  | 137                       | 36.3 | 22                    | 45.8                      | 29 | 27.9                  | 5                         | 71.4 | 30                    | 50.0                      | 4 | 50.0                  | 45  | 40.2 | 2 | 25.0 |
| Education level <sup>b)</sup>        |                           |      | 0.044                 |                           |    | 0.162                 |                           |      | 0.040                 |                           |   | 0.950                 |     |      |   |      |
| Low                                  | 121                       | 37.2 | 21                    | 53.8                      | 37 | 37.4                  | 5                         | 62.5 | 19                    | 36.5                      | 6 | 75.0                  | 39  | 38.6 | 3 | 37.5 |
| High                                 | 204                       | 62.8 | 18                    | 46.2                      | 62 | 62.6                  | 3                         | 37.5 | 33                    | 63.5                      | 2 | 25.0                  | 62  | 61.4 | 5 | 62.5 |
| Operation                            |                           |      | 0.055                 |                           |    | 0.033                 |                           |      | 0.074                 |                           |   | 0.416                 |     |      |   |      |
| Lumpectomy                           | 172                       | 45.0 | 15                    | 30.6                      | 37 | 34.6                  | 0                         | 0    | 18                    | 29.5                      | 0 | 0                     | 45  | 39.5 | 2 | 25.0 |
| Mastectomy                           | 210                       | 55.0 | 34                    | 69.4                      | 70 | 65.4                  | 9                         | 100  | 43                    | 70.5                      | 8 | 100                   | 69  | 60.5 | 6 | 75.0 |
| Radiation therapy                    |                           |      | 0.091                 |                           |    | 0.565                 |                           |      | 0.253                 |                           |   | 0.562                 |     |      |   |      |
| No                                   | 178                       | 50.7 | 30                    | 63.8                      | 53 | 52.0                  | 5                         | 62.5 | 30                    | 53.6                      | 6 | 75.0                  | 55  | 51.9 | 5 | 62.5 |
| Yes                                  | 173                       | 49.3 | 17                    | 36.2                      | 49 | 48.0                  | 3                         | 37.5 | 26                    | 46.4                      | 2 | 25.0                  | 51  | 48.1 | 3 | 37.5 |
| Chemotherapy                         |                           |      | 0.098                 |                           |    | 0.873                 |                           |      | 0.095                 |                           |   | 0.204                 |     |      |   |      |
| No                                   | 107                       | 30.6 | 20                    | 42.6                      | 23 | 22.5                  | 2                         | 25.0 | 9                     | 16.4                      | 3 | 42.9                  | 18  | 17.0 | 0 | 0    |
| Yes                                  | 243                       | 69.4 | 27                    | 57.4                      | 79 | 77.5                  | 6                         | 75.0 | 46                    | 83.6                      | 4 | 57.1                  | 88  | 83.0 | 8 | 100  |
| Herceptin therapy                    |                           |      | 0.604                 |                           |    | 0.797                 |                           |      | 0.789                 |                           |   | 0.783                 |     |      |   |      |
| No                                   | 349                       | 99.4 | 47                    | 100                       | 59 | 57.8                  | 5                         | 62.5 | 29                    | 51.8                      | 4 | 57.1                  | 105 | 99.1 | 8 | 100  |
| Yes                                  | 2                         | 0.6  | 0                     | 0                         | 43 | 42.2                  | 3                         | 37.5 | 27                    | 48.2                      | 3 | 42.9                  | 1   | 0.9  | 0 | 0    |
| Endocrine therapy                    |                           |      | 0.746                 |                           |    | 0.142                 |                           |      | 0.880                 |                           |   | 0.992                 |     |      |   |      |
| No                                   | 27                        | 7.7  | 3                     | 6.4                       | 9  | 8.8                   | 2                         | 25.0 | 50                    | 89.3                      | 7 | 87.5                  | 92  | 87.6 | 7 | 87.5 |
| Yes                                  | 323                       | 92.3 | 44                    | 93.6                      | 93 | 91.2                  | 6                         | 75.0 | 6                     | 10.7                      | 1 | 12.5                  | 13  | 12.4 | 1 | 12.5 |

HER2, human epidermal growth factor receptor 2; HR, hormonal receptor; SD, standard deviation; NA, not applicable.

<sup>a)</sup>P-value for mean age was calculated by t-test and all the other P-values were calculated by chi-square test. <sup>b)</sup>Education level was classified into two groups according to the length of education period; the high education level group (≥12 years) and the low education level group (<12 years).
